# Supplementary material
Source: PubMed Central journal article supplement (PMC3243535)
Supplement: supp_M111.266114_jbc.M111.266114-2.pdf [file supp_M111.266114_jbc.M111.266114-2.pdf]

Table S1. Fatty acid composition (weight %) in yeast cells expressing genes when feeding with C16:1<sup>Δ7</sup>

| Fatty acid                | Vector            | AtFAD2            | CeFAT-2           | CeFAT-1           |
|---------------------------|-------------------|-------------------|-------------------|-------------------|
| C16:0                     | 6.4 ± 0.3         | 6.7 ± 0.3         | 7.2 ± 0.6         | 6.4 ± 0.1         |
| C16:1 <sup>Δ7</sup>       | <b>43.1 ± 0.2</b> | <b>43.3 ± 5.1</b> | <b>42.8 ± 1.9</b> | <b>43.5 ± 0.7</b> |
| C16:1 <sup>Δ9</sup>       | 13.2 ± 0.1        | 11.5 ± 0.8        | 8.1 ± 0.4         | 13.3 ± 0.2        |
| C16:2 <sup>Δ7,10</sup>    |                   | 0.3 ± 0.1         | 1.3 ± 0.1         |                   |
| C16:2 <sup>Δ9,12</sup>    |                   | 1.3 ± 0.3         | 4.5 ± 0.4         |                   |
| C16:3 <sup>Δ9,12,15</sup> |                   |                   | 0.8 ± 0.1         |                   |
| C18:0                     | 9.8 ± 0.2         | 10.3 ± 0.8        | 11.5 ± 1.1        | 9.8 ± 0.1         |
| C18:1 <sup>Δ9</sup>       | 26.8 ± 0.4        | 15.9 ± 1.4        | 9.2 ± 0.5         | 26.1 ± 0.4        |
| C18:1 <sup>Δ11</sup>      | 0.3 ± 0.0         | 0.3 ± 0.0         | 0.2 ± 0.0         | 0.3 ± 0.0         |
| C18:2 <sup>Δ9,12</sup>    |                   | 10.0 ± 2.1        | 12.2 ± 0.5        | 0.2 ± 0.0         |
| C18:3 <sup>Δ9,12,15</sup> |                   |                   | 1.4 ± 0.1         |                   |
| Conversion (%)            |                   |                   |                   |                   |
| C16:1 <sup>Δ7</sup>       |                   | 0.7 ± 0.2         | 3.0 ± 0.3         |                   |
| C16:1 <sup>Δ9</sup>       |                   | 9.9 ± 1.9         | 35.5 ± 3.3        |                   |

The fed substrate indicated in bold.

Trace amount of C15, C17 and trans C16 or C18 are not included
