# Supplementary material
Source: PubMed Central journal article supplement (PMC3243535)
Supplement: supp_M111.266114_jbc.M111.266114-3.pdf [file supp_M111.266114_jbc.M111.266114-3.pdf]

Table S2. Fatty acid compositions (weight %) of yeast cells expressing genes when feeding with C20:4

| Fatty acid                     | Vector            | AtFAD2            | CeFAT-2           | CeFAT-1           | Vector            | AtFAD2            | CeFAT-2           | CeFAT-1           |
|--------------------------------|-------------------|-------------------|-------------------|-------------------|-------------------|-------------------|-------------------|-------------------|
| C16:0                          | 6.3 ± 0.1         | 6.4 ± 0.1         | 6.0 ± 0.0         | 6.6 ± 0.1         | 10.2 ± 0.1        | 10.3 ± 0.1        | 10.0 ± 0.1        | 9.9 ± 0.0         |
| C16:1 <sup>Δ9</sup>            | 16.4 ± 0.1        | 15.0 ± 0.2        | 9.2 ± 0.4         | 17.2 ± 0.5        | 18.4 ± 0.3        | 16.7 ± 0.3        | 11.1 ± 0.3        | 20.7 ± 0.3        |
| C16:2 <sup>Δ9,12</sup>         |                   | 0.9 ± 0.0         | 7.0 ± 0.3         |                   |                   | 1.6 ± 0.1         | 7.1 ± 0.1         |                   |
| C16:3 <sup>Δ9,12,15</sup>      |                   |                   | 0.3 ± 0.0         |                   |                   |                   | 0.4 ± 0.0         |                   |
| C18:0                          | 11.3 ± 0.2        | 12.0 ± 0.0        | 13.1 ± 0.3        | 11.8 ± 0.1        | 11.7 ± 0.2        | 12.9 ± 0.1        | 16.2 ± 0.1        | 11.3 ± 0.1        |
| C18:1 <sup>Δ9</sup>            | 35.7 ± 0.9        | 25.8 ± 0.3        | 14.1 ± 0.4        | 38.1 ± 1.1        | 35.1 ± 0.3        | 22.3 ± 0.2        | 13.2 ± 0.2        | 37.4 ± 0.4        |
| C18:1 <sup>Δ11</sup>           | 0.5 ± 0.0         | 0.4 ± 0.0         | 0.3 ± 0.0         | 0.5 ± 0.0         | 0.6 ± 0.0         | 0.6 ± 0.0         | 0.4 ± 0.0         | 0.7 ± 0.0         |
| C18:2 <sup>Δ9,12</sup>         |                   | 9.2 ± 0.2         | 18.4 ± 0.9        |                   |                   | 12.1 ± 0.3        | 18.4 ± 0.2        |                   |
| C18:3 <sup>Δ9,12,15</sup>      |                   |                   | 1.1 ± 0.1         |                   |                   |                   | 1.7 ± 0.0         |                   |
| C20:5 <sup>Δ5,8,11,14</sup>    |                   |                   |                   |                   | <b>23.7 ± 0.3</b> | <b>23.4 ± 0.8</b> | <b>20.7 ± 0.4</b> | <b>16.1 ± 0.5</b> |
| C20:4 <sup>Δ8,11,14,17</sup>   | <b>29.8 ± 0.9</b> | <b>30.2 ± 0.3</b> | <b>30.1 ± 2.1</b> | <b>25.7 ± 1.8</b> |                   |                   |                   |                   |
| C20:4 <sup>Δ5,8,11,14,17</sup> |                   |                   |                   |                   |                   |                   | 0.4 ± 0.0         | 3.5 ± 0.1         |
| Conversion (%)                 |                   |                   |                   |                   |                   |                   | 2.1 ± 0.1         | 18.0 ± 0.0        |

The fed substrates indicated in bold.

Trace amount of C15, C17 and trans C16 or C18 are not included
