# Supplementary material
Source: PubMed Central journal article supplement (PMC3243535)
Supplement: supp_M111.266114_jbc.M111.266114-4.pdf [file supp_M111.266114_jbc.M111.266114-4.pdf]

Table S3. Fatty acid composition (weight%) of yeast cells expressing CeFAT-1

| Fatty acid                     | pYES2      | CeFAT-1    | pYES2             | CeFAT-1           | pYES2             | CeFAT-1           | pYES2             | CeFAT-1          | pYES2             | CeFAT-1           | pYES2            | CeFAT-1          |
|--------------------------------|------------|------------|-------------------|-------------------|-------------------|-------------------|-------------------|------------------|-------------------|-------------------|------------------|------------------|
| C16:0                          | 7.1 ± 0.0  | 8.4 ± 0.2  | 8.2 ± 0.1         | 9.9 ± 0.3         | 8.4 ± 0.3         | 10.7 ± 0.2        | 7.8 ± 0.1         | 10.1 ± 0.2       | 6.3 ± 0.0         | 8.4 ± 0.1         | 6.9 ± 0.0        | 9.1 ± 0.2        |
| C16:1 <sup>Δ9</sup>            | 27.4 ± 0.2 | 23.8 ± 0.1 | 15.1 ± 0.2        | 13.8 ± 0.6        | 18.3 ± 0.2        | 18.3 ± 0.3        | 22.7 ± 0.3        | 21.3 ± 1.6       | 25.3 ± 0.1        | 23.3 ± 0.4        | 26.1 ± 0.6       | 23.4 ± 0.1       |
| C18:0                          | 7.6 ± 0.1  | 10.0 ± 0.2 | 8.5 ± 0.1         | 10.4 ± 0.2        | 8.9 ± 0.1         | 11.2 ± 0.1        | 8.8 ± 0.1         | 11.1 ± 0.6       | 6.8 ± 0.1         | 9.2 ± 0.1         | 7.2 ± 0.1        | 9.7 ± 0.1        |
| C18:1 <sup>Δ9</sup>            | 54.7 ± 0.6 | 54.7 ± 0.5 | 29.7 ± 0.4        | 28.2 ± 0.6        | 38.1 ± 0.4        | 40.4 ± 0.6        | 44.8 ± 0.5        | 44.5 ± 1.9       | 48.1 ± 1.4        | 47.6 ± 0.5        | 48.1 ± 1.4       | 49.7 ± 0.3       |
| C18:1 <sup>Δ11</sup>           | 2.3 ± 0.1  | 2.1 ± 0.1  | 1.1 ± 0.1         | 1.0 ± 0.2         | 1.5 ± 0.1         | 1.5 ± 0.1         | 1.5 ± 0.0         | 1.3 ± 0.1        | <b>12.6 ± 1.6</b> | <b>10.2 ± 0.6</b> | 1.4 ± 0.0        | 1.2 ± 0.0        |
| C18:1 <sup>Δ12</sup>           |            |            |                   |                   |                   |                   |                   |                  |                   |                   | <b>5.7 ± 0.1</b> | <b>5.0 ± 0.1</b> |
| C18:2 <sup>Δ9,12</sup>         |            |            | <b>36.9 ± 0.7</b> | <b>32.0 ± 0.6</b> | <b>19.8 ± 1.2</b> | <b>13.1 ± 0.9</b> |                   |                  |                   |                   |                  |                  |
| C18:2 <sup>Δ9,15</sup>         | 0.0        | 0.3 ± 0.0  |                   | *                 |                   | *                 | 0.0               | 0.2 ± 0.0        | 0.0               | 0.4 ± 0.0         | 0.0              | 0.3 ± 0.0        |
| C18:3 <sup>Δ6,9,12</sup>       |            |            |                   |                   |                   |                   | <b>13.9 ± 0.7</b> | <b>6.6 ± 2.2</b> |                   |                   |                  |                  |
| C18:3 <sup>Δ9,12,15</sup>      |            |            | 0.0               | 4.1 ± 0.3         | 0.0               | 1.3 ± 0.1         |                   |                  |                   |                   |                  |                  |
| C18:4 <sup>Δ6,9,12,15</sup>    |            |            |                   |                   |                   |                   | 0.0               | 3.9 ± 0.8        |                   |                   |                  |                  |
| C20:4 <sup>Δ5,8,11,14</sup>    |            |            |                   |                   | <b>4.8 ± 0.2</b>  | <b>2.8 ± 0.2</b>  |                   |                  |                   |                   |                  |                  |
| C20:5 <sup>Δ5,8,11,14,17</sup> |            |            |                   |                   | 0.0               | 0.2 ± 0.0         |                   |                  |                   |                   |                  |                  |
| C18:2 conversion (%)           |            |            |                   | 11.4 ± 0.9        |                   | 9.4 ± 1.3         |                   |                  |                   |                   |                  |                  |
| C20:4 conversion (%)           |            |            |                   |                   |                   | 7.0 ± 0.8         |                   |                  |                   |                   |                  |                  |

Bold font indicates the fed substrate.

\* indicates co-eluted with C18:2<sup>Δ9,12</sup>
