# Supplementary material
Source: PubMed Central journal article supplement (PMC3243535)
Supplement: supp_M111.266114_jbc.M111.266114-5.pdf [file supp_M111.266114_jbc.M111.266114-5.pdf]

Fig. S1

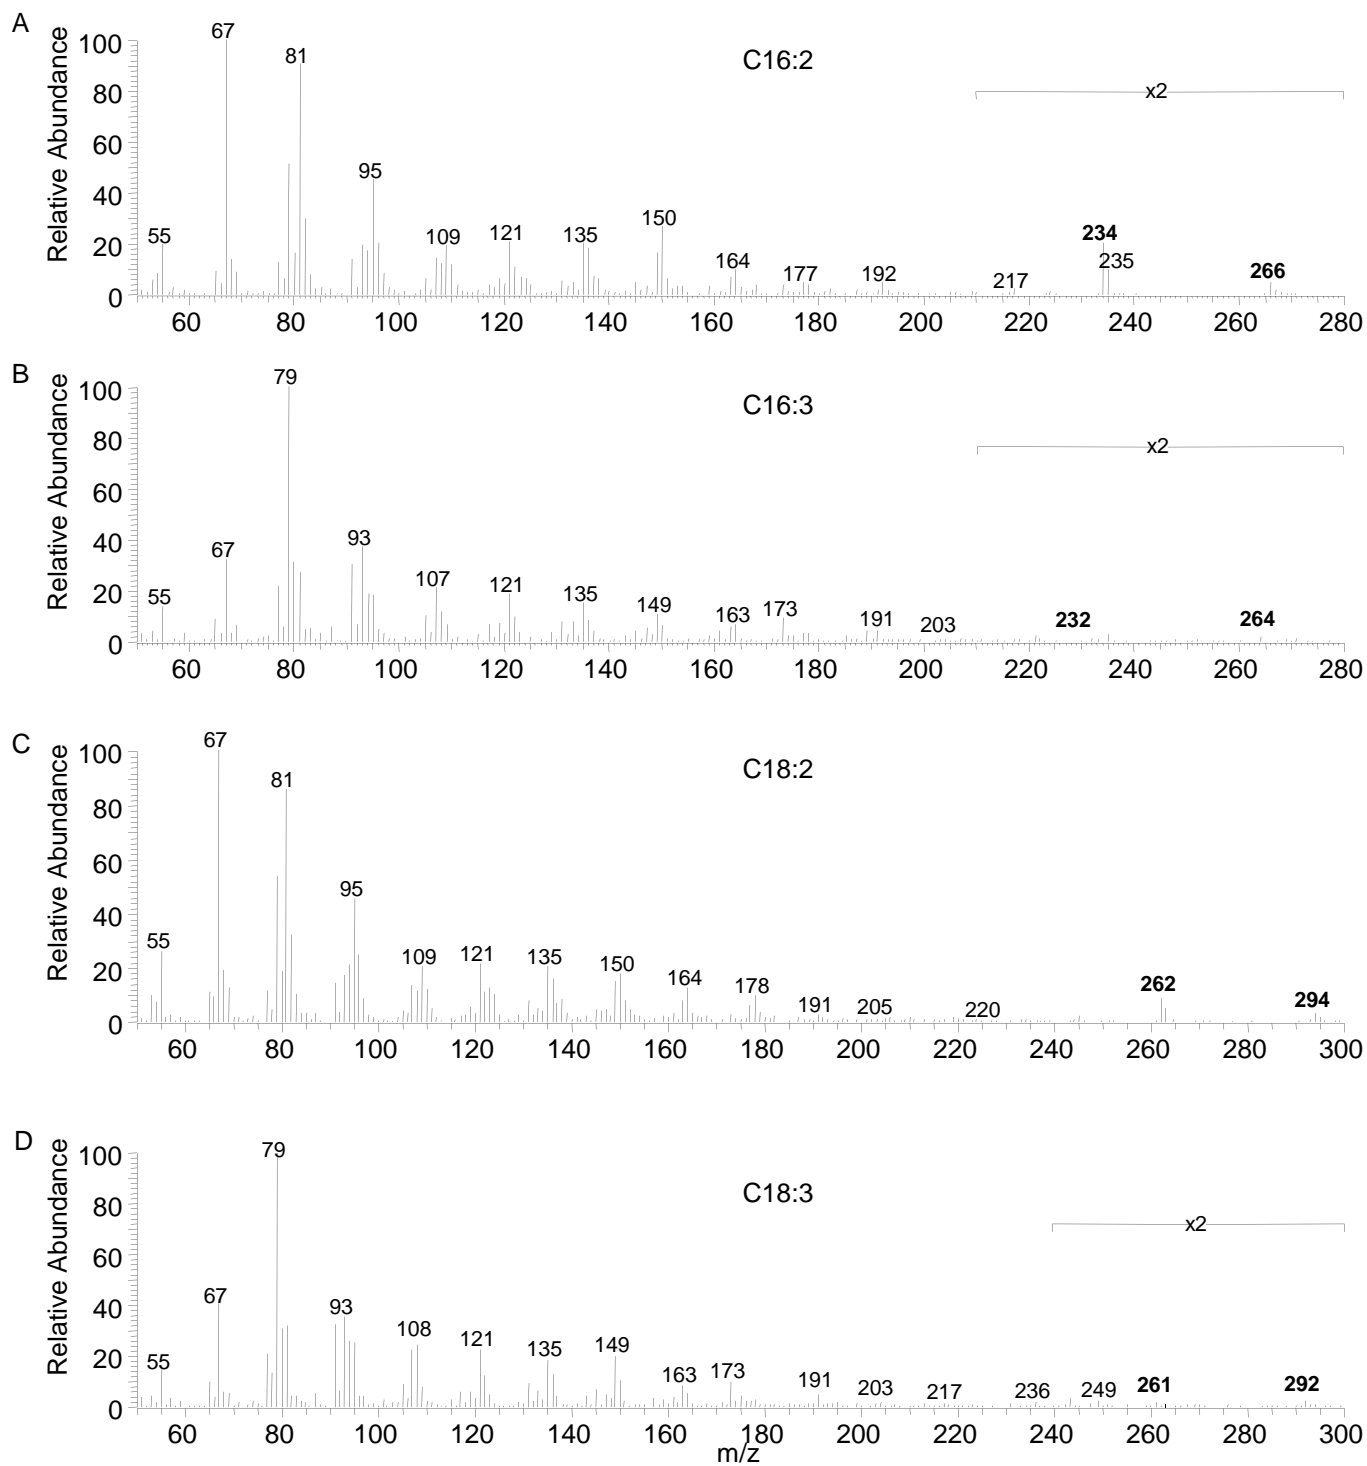

Fig. S2

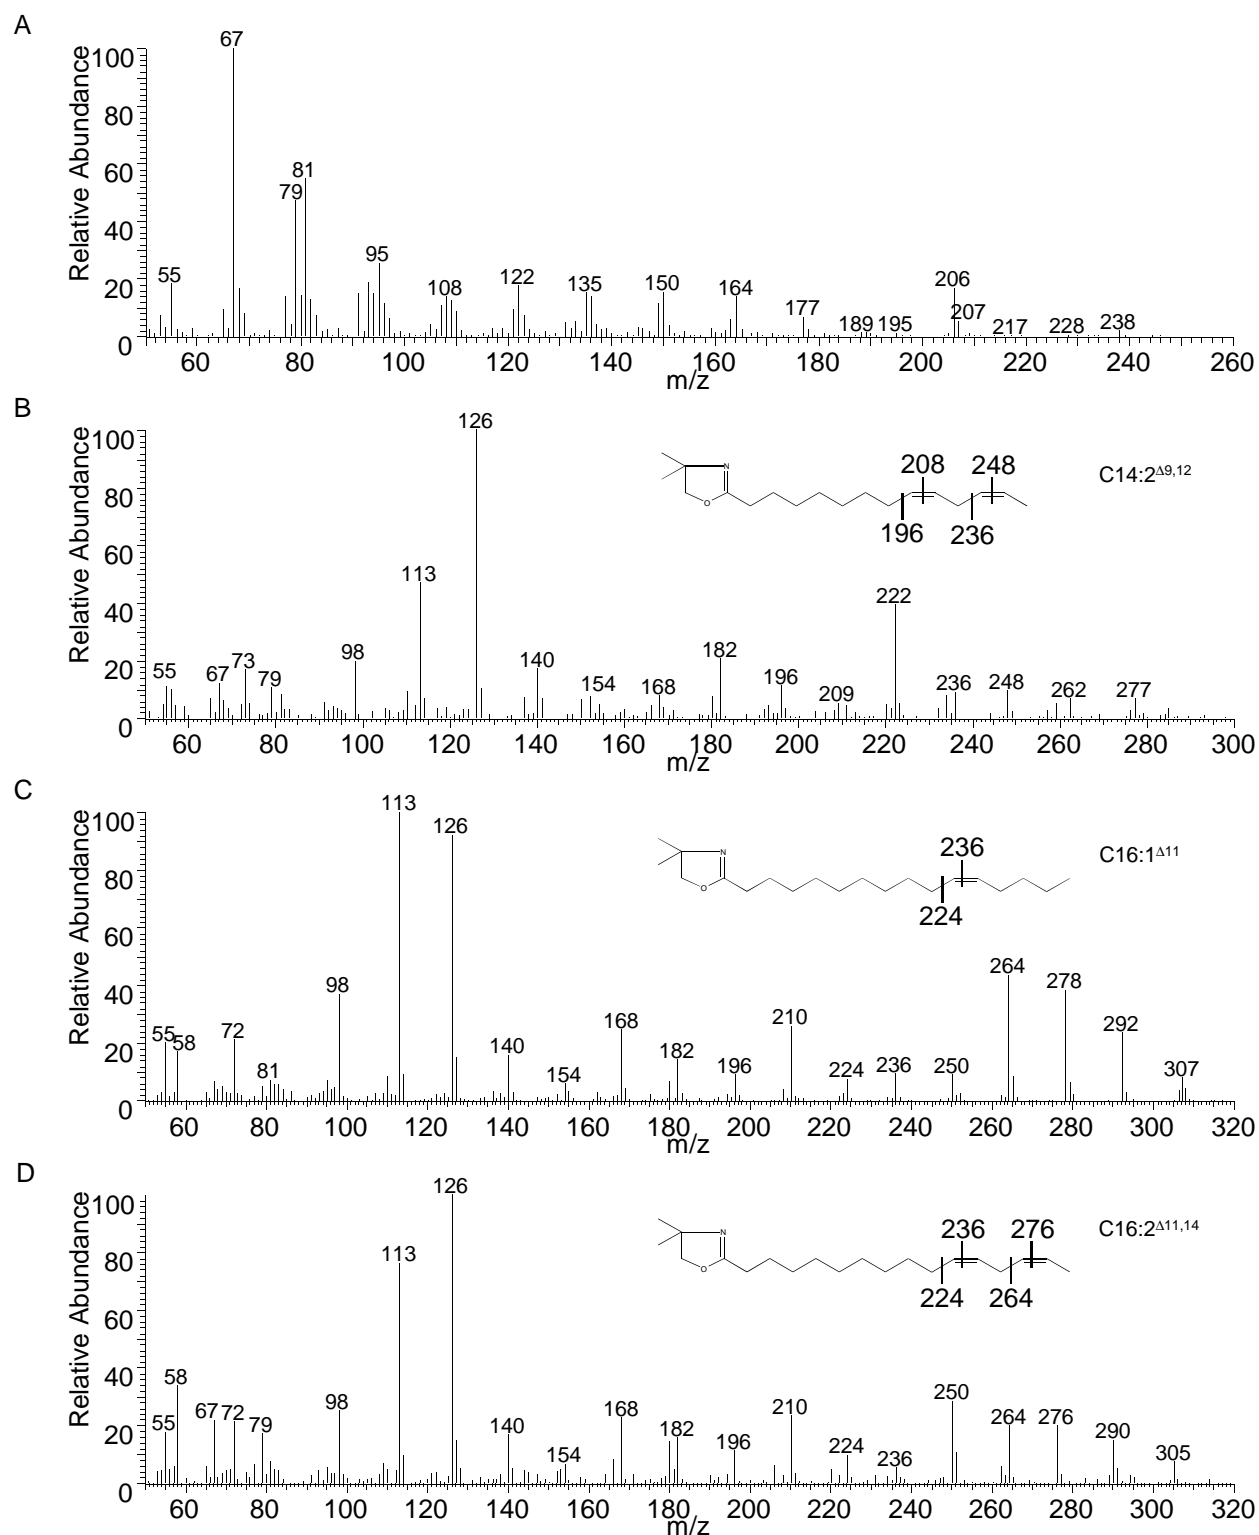

Fig. S2 continued

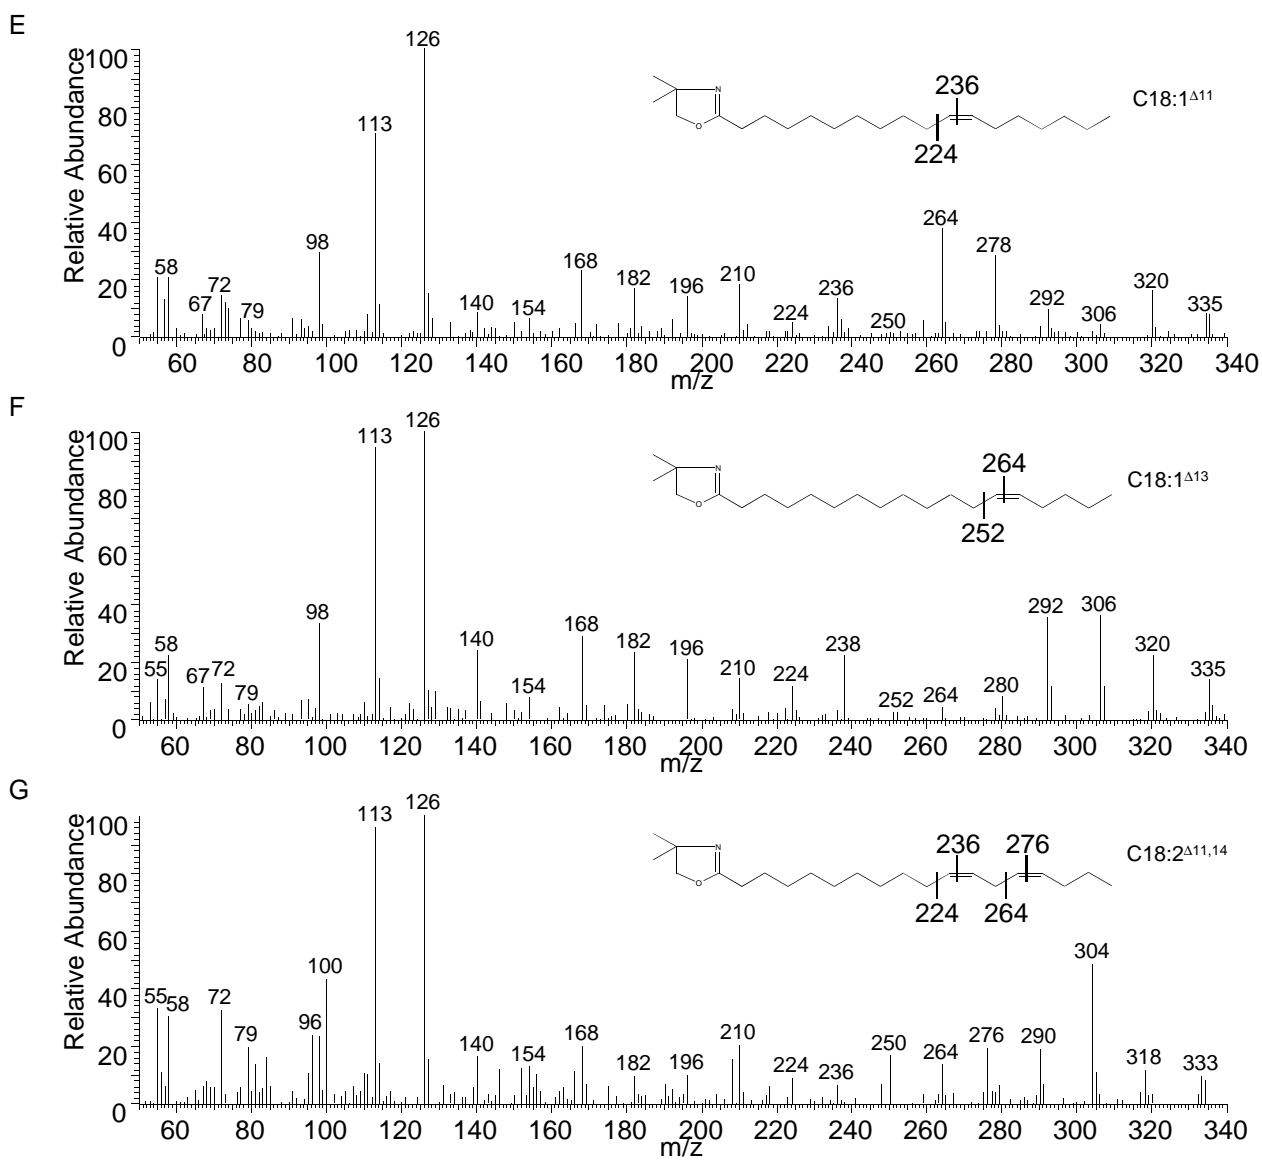

Fig. S3

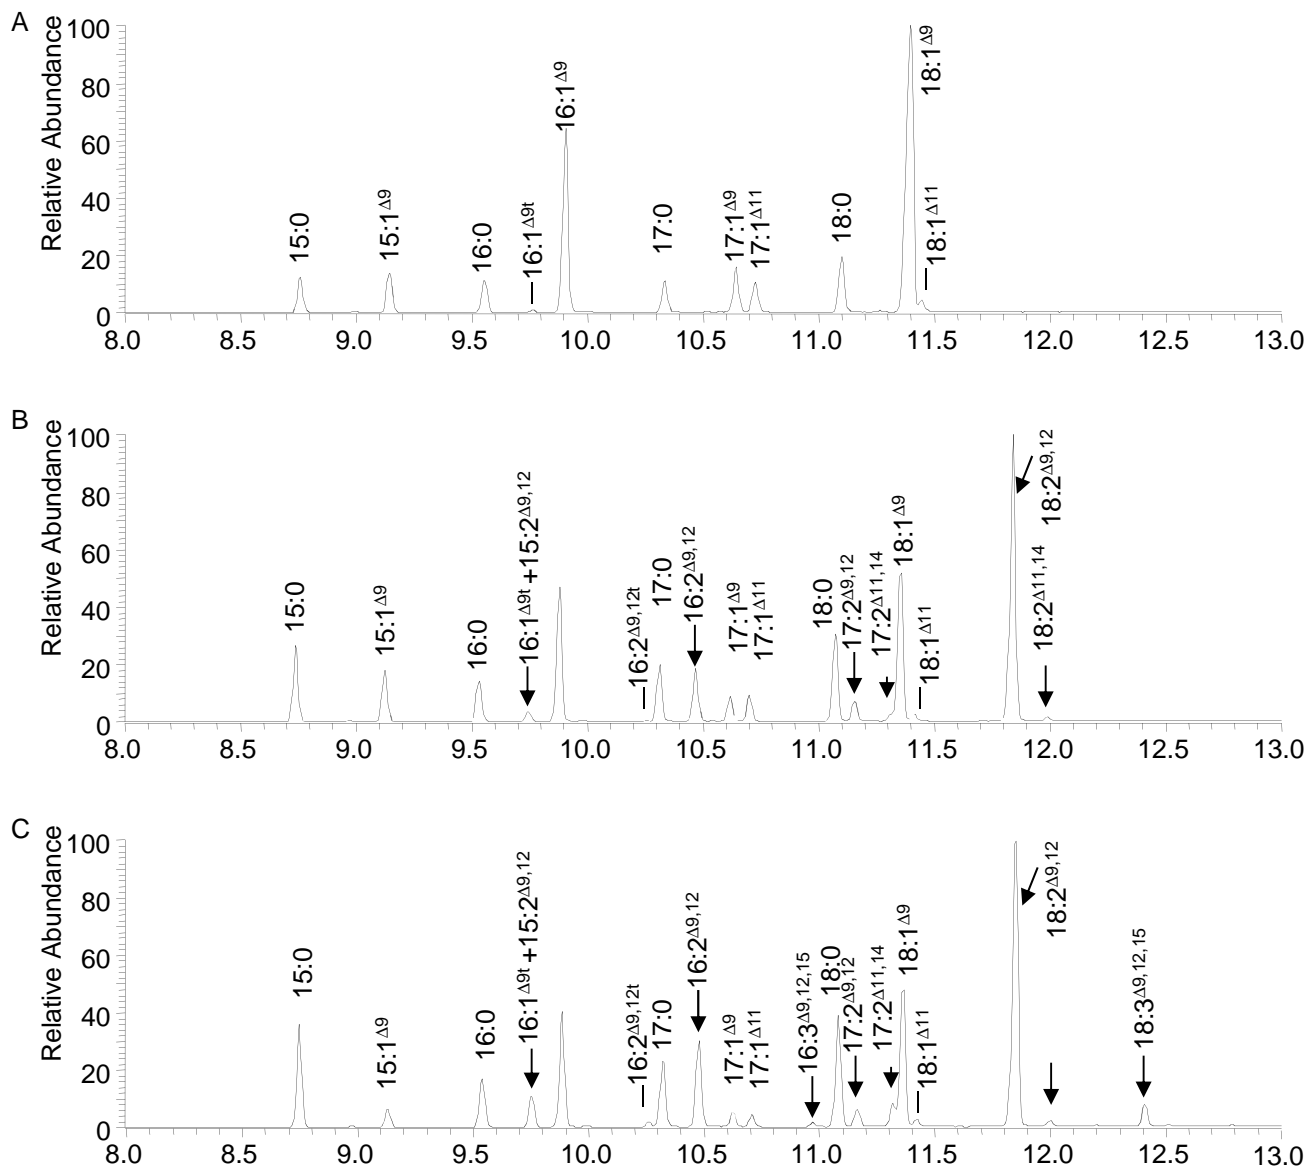

Fig. S3 continued

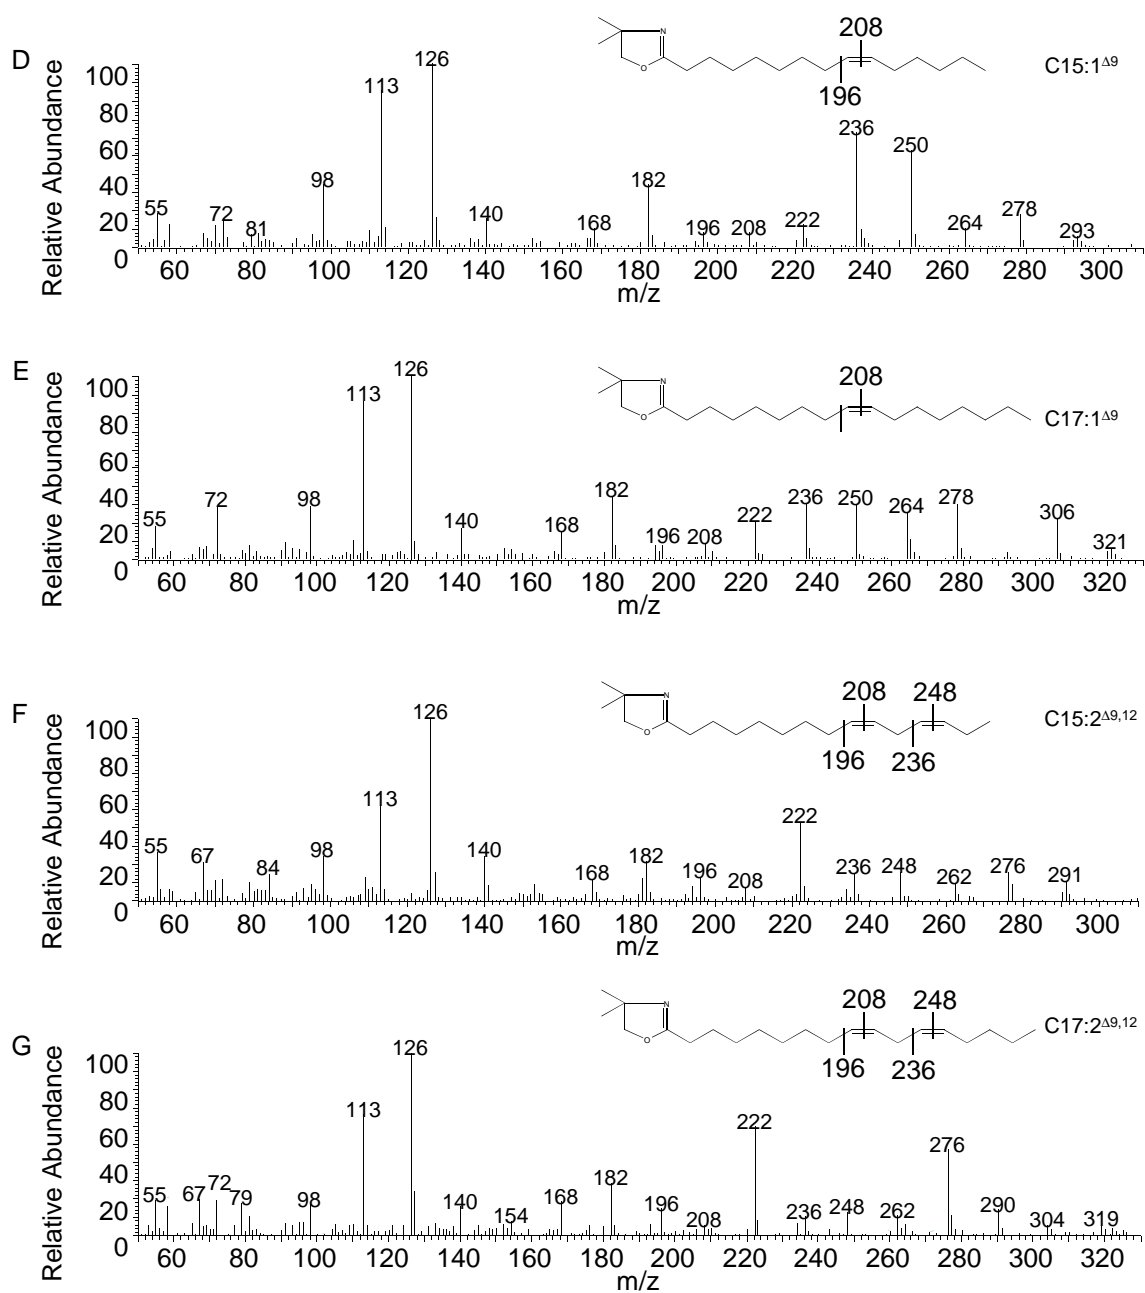

Fig. S4

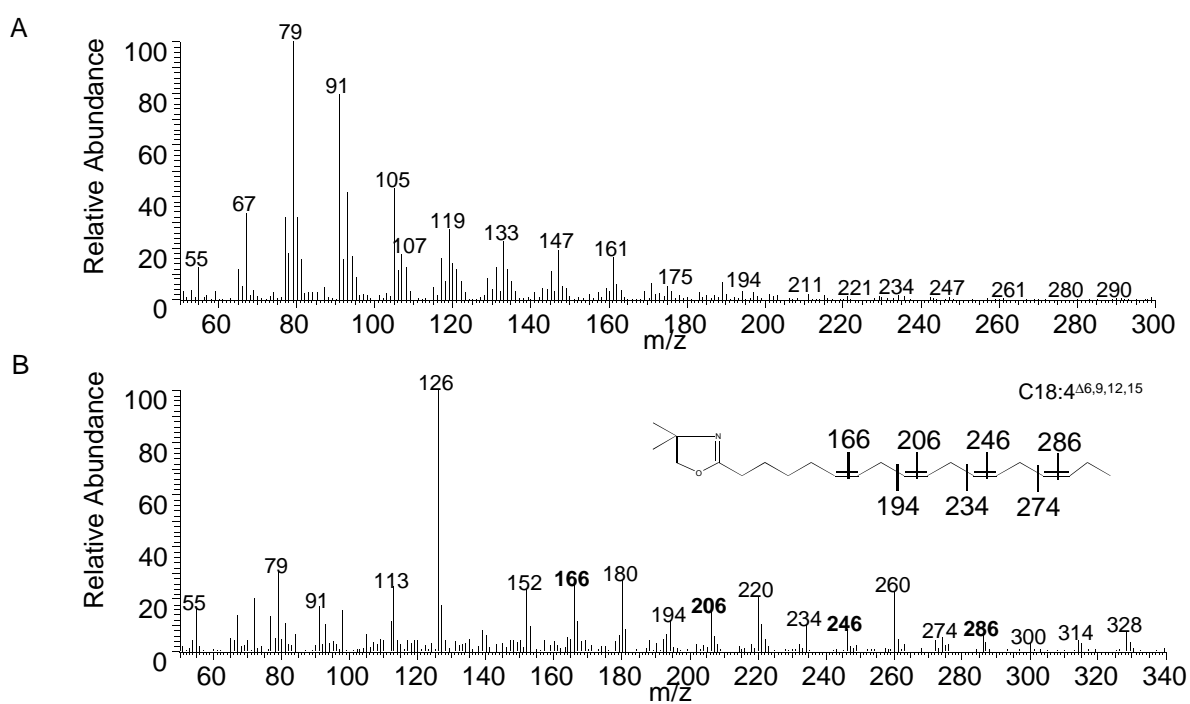

Fig. S5

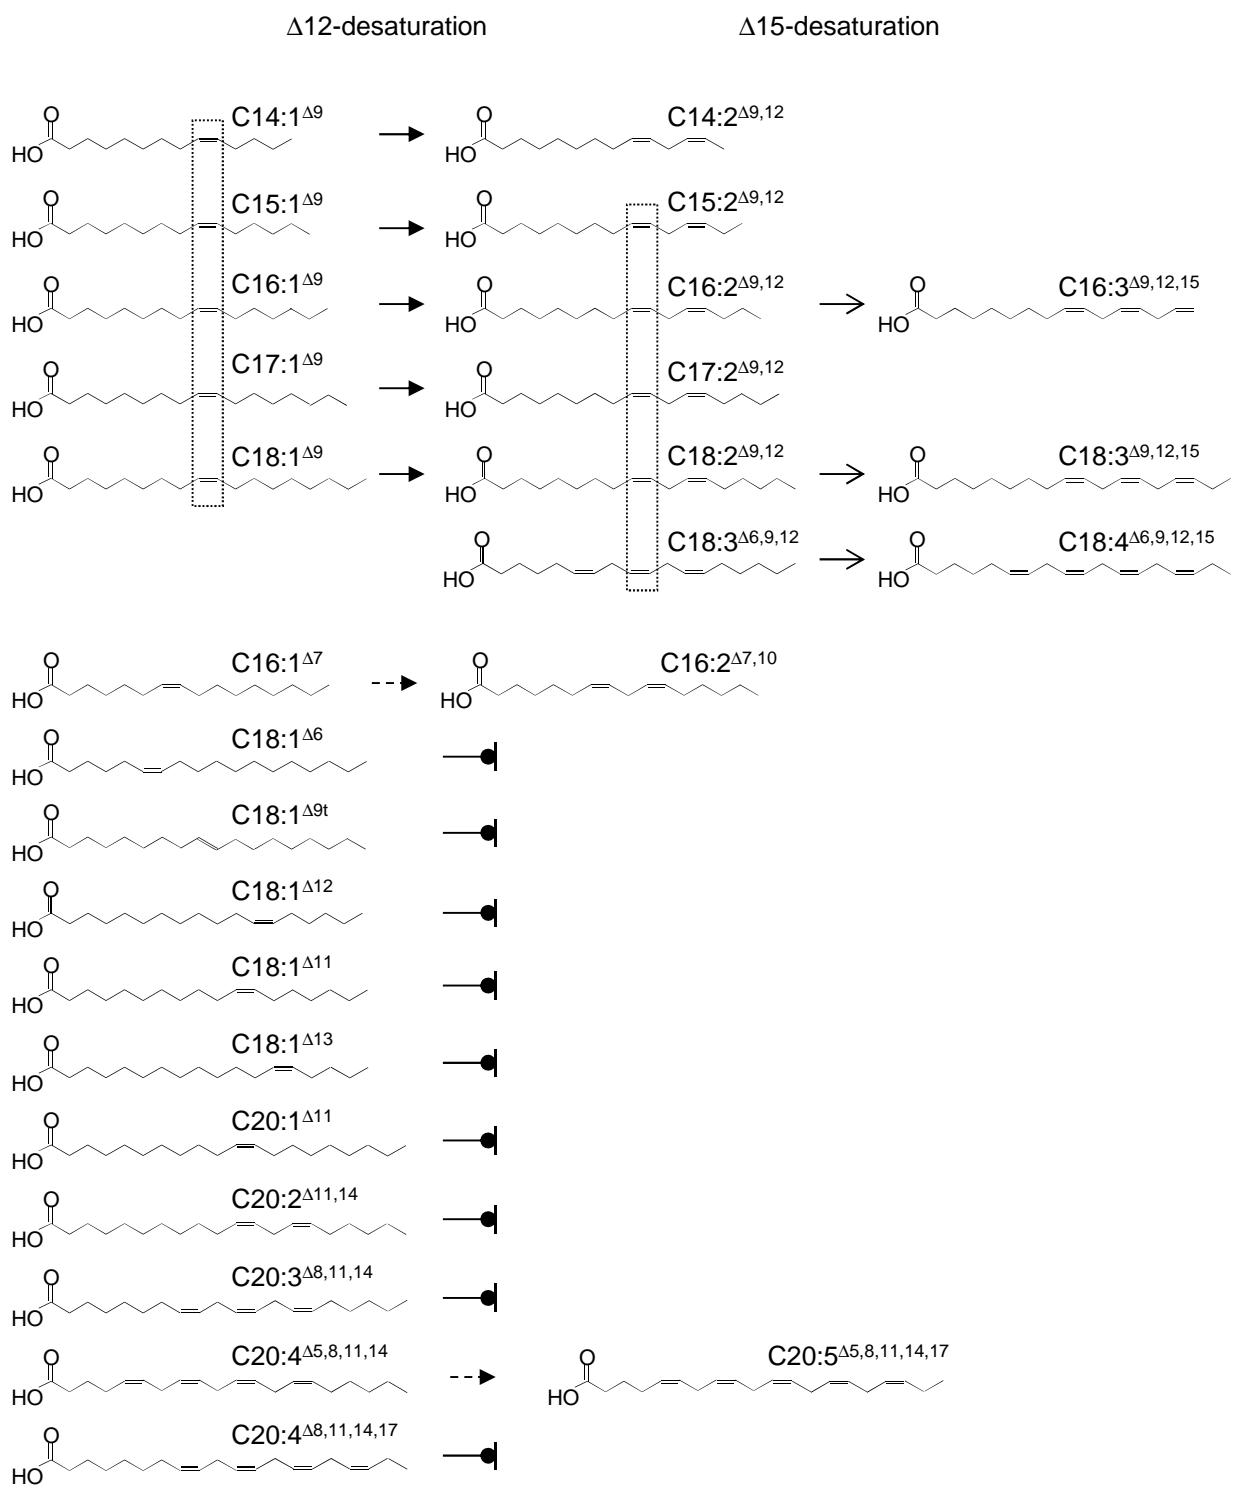

Fig. S6

|           | Box I     | Box II               | Box III                |     |
|-----------|-----------|----------------------|------------------------|-----|
| AtFAD2    | VIAHECGHH | KYSHRRHHSNTGSLERDEV  | TDTHVAHHLFS-TMPHYNAMEA | Δ12 |
| Ma Δ12    | VLAHECGHQ | RISHSKHHKATGHMTKDQV  | VHTHVAHHLFS-QMPFYHAEAA |     |
| Ui Δ12    | VLAHECGHQ | RISHSKHHKATGHMTKDQV  | VHTHVAHHLFS-QMPFYHAEAA |     |
| Cp Δ12    | VIAHECGHQ | KFSHSAHHKATGHMERDMV  | IETHVLHHYVS-SIPFYNADEA |     |
| AtFAD3    | VLGHDCGHG | RISHRTHHQNHGHVENDES  | IGTHVIHHLFP-QIPHYHLVDA | Δ15 |
| CeFAT-1   | VVGHDCLHG | QKSHKLHHAFTNHIDKDHG  | TDGHVAHFFN-KIPHYHLIEA  |     |
| CeFAT-2   | CVGHDCGHG | QKSHRQHHQYTSHV EKDKG | TNGHVAHFFFTKIPHYHLEA   | bi  |
| Cp Δ12/15 | IIAHECGHG | KFSHSAHHKGTGNMERDMA  | VETHVLHHYVS-SIPFYNADEA |     |
| Fm Δ12/15 | ILGHECGHG | KYSHRRHHRFTGHMDLDMA  | IEKHVVHHLFP-KIPFYKADEA |     |
| Mg Δ12/15 | IIAHECGHG | KFSHRRHNNFTGHMEKDMA  | IGTHVAHHLFP-RIPFYKAEEA |     |
| An Δ12/15 | IIAHECGHG | KITHARHHRYTNNTERDTA  | IDHHVVHHLFN-RIPFYHAEAA |     |
| Ac Δ12/15 | VLAHECGHG | KFSHAKHHHYTNHMTKDEP  | VDTHVTHHIFS-YLPFYNAEEA |     |
| Sb Δ12/15 | VLGHDCGHG | RISHRTHHQNHGHVDRDES  | IGTHVIHHLFP-QIPHYHLVEA |     |
